# Supplementary material for: Growth of MSe semiconductor nanowires on metal substrates through an Ag2Se-catalyzed solution–solid–solid mechanism (M = Zn, Cd and Mn)
Source: Royal Society of Chemistry journal article supplement (doi:10.1039/d1ce00915j), 2021-01-01
Supplement: d1ce00915j1.pdf [file d1ce00915j1.pdf]

## **Electronic Supplementary Information**

### **Growth of MSe semiconductor nanowires on metal substrates through an Ag<sub>2</sub>Se-catalyzed solution-solid-solid mechanism (M = Zn, Cd and Mn)**

Huimin Wang, Tingting Wang,\* Zibin Huang, Yizhuo Liu, Dehui Leng, Junli Wang\*

*School of Materials Science & Engineering, Jiangsu University, Zhenjiang 212013, P. R. China*

\*E-mail: wangjl@ujs.edu.cn; wang\_tt@ujs.edu.cn

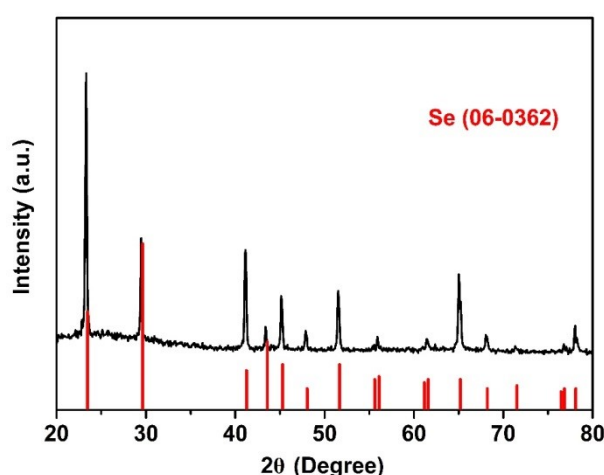

**Fig. S1** XRD pattern of the Se intermediate generated from the reduction of SeO<sub>2</sub> in a control experiment.

#### **Details for the control experiment.**

The control experiment was conducted without adding metal precursors. Briefly, polyvinyl pyrrolidone (PVP, 0.200 g,  $M_w = 24000$ , K23–27) and SeO<sub>2</sub> (1.0 mmol, 0.11 g) were respectively dissolved into DMF (10 mL) in a 50 mL three-necked flask under magnetic stirring. Then, 5 mL oleic acid (OA, 99%) was added into the above solution, and the flask was heated to 160 °C. It was observed that the color of solution changes from colorless, red-brown, to black, which indicated the formation of elemental Se. After naturally cooled to room temperature, the black precipitate was collected by centrifugation, washed with ethanol, and finally dried at 60 °C for the powder XRD analysis.

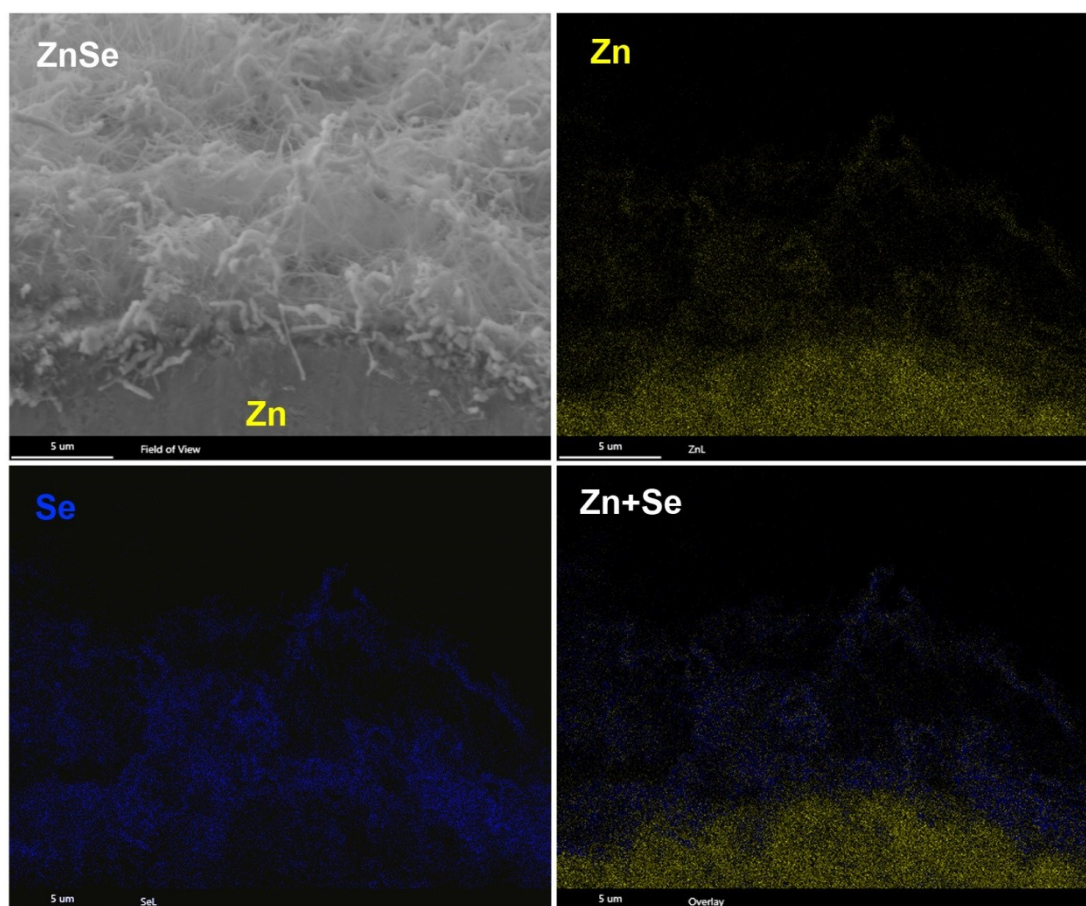

**Fig. S2** SEM and EDS mapping images of the ZnSe/Zn NWs/metal sample. It is observed that Zn and Se elements are distributed in the region of ZnSe NWs. Zn shows a very strong signal at the bottom of the Zn substrate region, indicating the substrate is composed of pure metallic Zn.

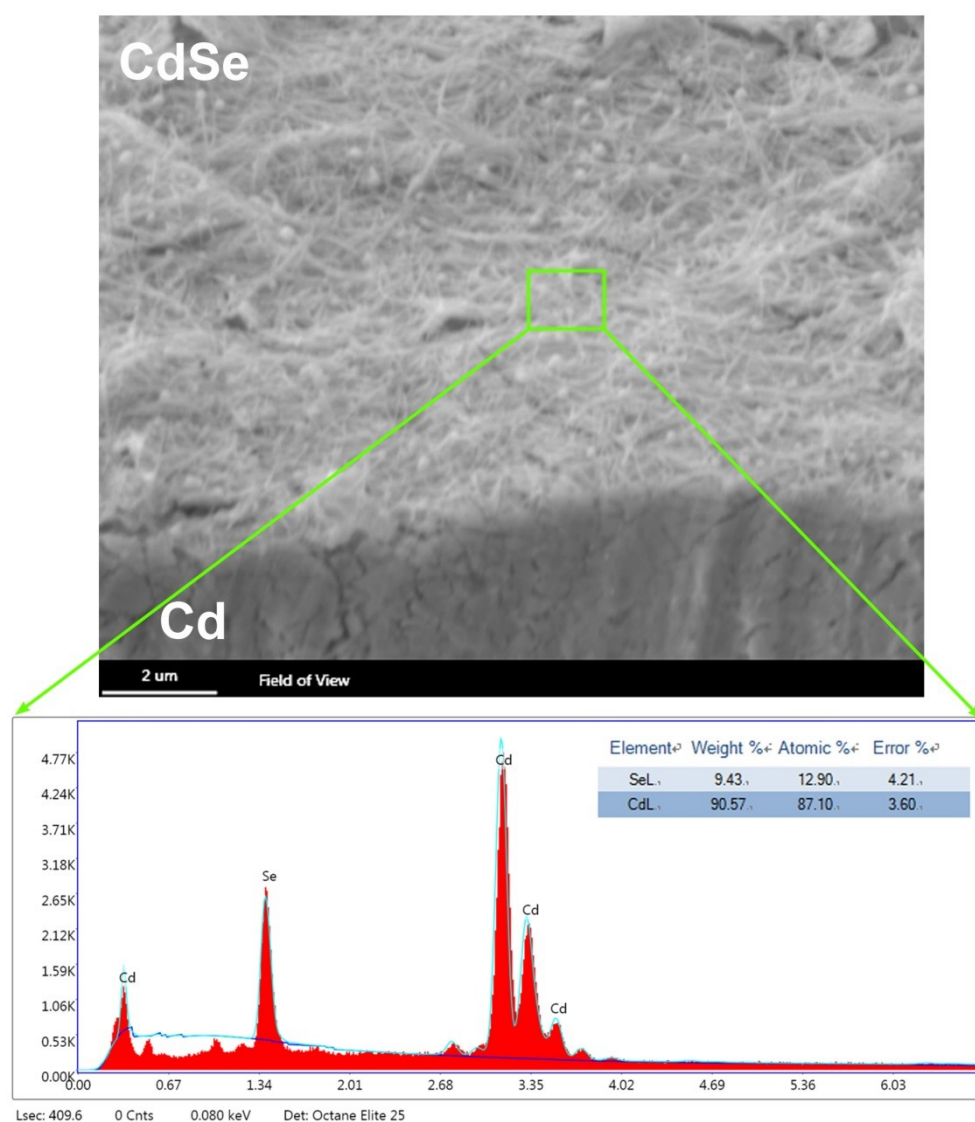

**Fig. S3** SEM image and EDS point-analysis spectrum of the CdSe/Cd NWs/metal sample. It is observed that the NWs are composed of Cd and Se elements. The high molar ratio of Cd is due to the metallic Cd substrate.

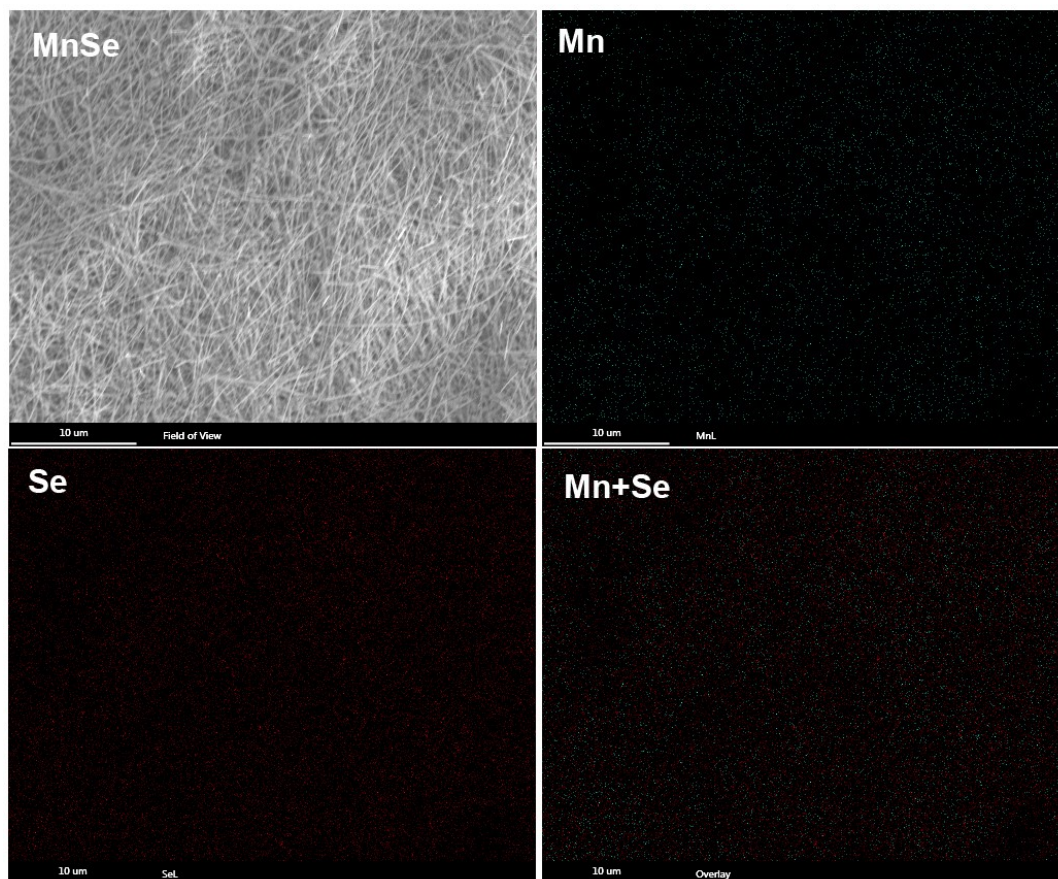

**Fig. S4** SEM and EDS mapping images of the MnSe/Mn NWs/metal sample. It is observed that Mn and Se elements are uniformly distributed in the region of MnSe NWs.



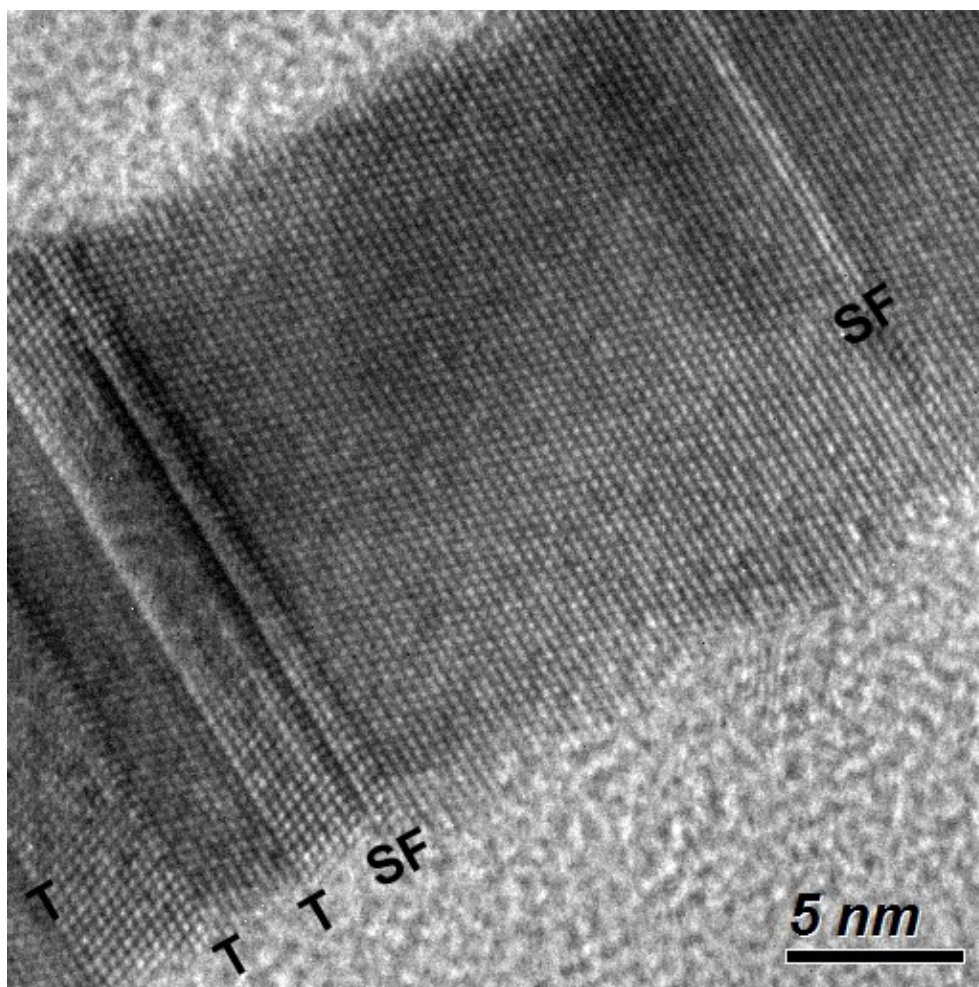

**Fig. S5** HRTEM image of a zb-structured ZnSe NW containing stacking faults (SF) and twin (T) boundaries.

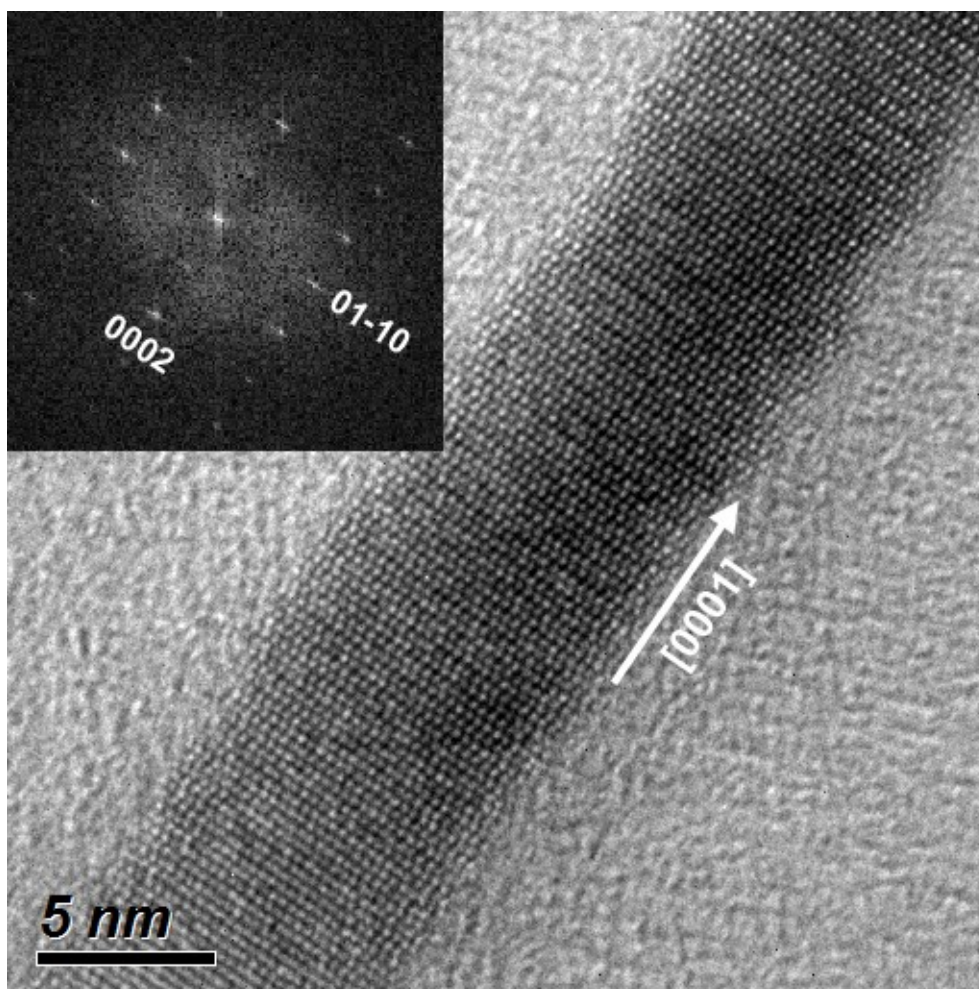

**Fig. S6** HRTEM image of another wz-structured MnSe NW with a [0001] growth direction.
